# Supplementary material
Source: Research Square preprint supplement (doi:10.21203/rs.3.rs-10409630/v1)
Supplement: Supplementary file 1 [file 6178d9871bb286e049a6f0d9.xlsx]

## Sheet: Sheet1
Title: Orchard applications of sodium hydrosulfide (NaHS) increase the yield of avocado (Persea americana Mill.) cv. ‘Hass’
By: Itzhak Kamara, Preetom Regon, Matan Bugaiski, Chen Dikman, Maya Cohen, Smadar Greenstein and Dana Charuvi
Table S1.
The table provides: the raw individual tree yield data (kg and number of fruit), and the calculated average fruit weight for each of the harvests during the three study years; the cumulative yield data; and the alternate bearing index (ABI).
Statistical analyses of the data, comparing control and NaHS-treated tree groups, are provided below the data.
Tree number	Treatment	Yield (kg)					Cumulative 3-year yield (kg)	Yield (number of fruit)					Cumulative 3-year yield (number of fruit)	Average fruit weight				Alternate Bearing Index (ABI)
		Year 1	Year 2-harvest I	Year 2-harvest II	Year 2-total	Year 3		Year 1	Year 2-harvest I	Year 2-harvest II	Year 2-total	Year 3		Year 1	Year 2-harvest I	Year 2-harvest II	Year 3	2024-2025	2025-2026
1	CR	61.9	44.7	143.25	187.95	0.5	250.35	239	244	964	1208	2	1449	258.996	183.197	148.6	250	0.504503	0.994694
2	CR	7.55	27.2	7.45	34.65	55.8	98	31	125	36	161	158	350	243.548	217.6	206.944	353.165	0.64218	0.233831
3	CR	1.95	25.25	4.8	30.05	30.6	62.6	6	104	21	125	100	231	325	242.788	228.571	306	0.878125	0.00906843
4	CR	1.6	18.65	6.65	25.3	1.7	28.6	6	83	28	111	7	124	266.667	224.699	237.5	242.857	0.881041	0.874074
9	CR	7.2	15.95	9.15	25.1	4.8	37.1	26	62	25	87	20	133	276.923	257.258	366	240	0.55418	0.67893
10	CR	0.8	10.4	0	10.4	3.7	14.9	3	39	0	39	13	55	266.667	266.667		284.615	0.857143	0.475177
11	CR	30.15	44.85	11.4	56.25	18.95	105.35	97	124	51	175	90	362	310.825	361.694	223.529	210.556	0.302083	0.496011
12	CR	26.85	51.6	13.25	64.85	74.65	166.35	121	233	74	307	332	760	221.901	221.459	179.054	224.849	0.414395	0.0702509
17	CR	7.7	10.15	0	10.15	24.85	42.7	29	40	0	40	93	162	265.517	253.75		267.204	0.137255	0.42
18	CR	2.8	24.5	5.95	30.45	15.9	49.15	12	106	21	127	62	201	233.333	231.132	283.333	256.452	0.831579	0.313916
19	CR	22	16.55	33.15	49.7	4.2	75.9	86	95	193	288	20	394	255.814	174.211	171.762	210	0.386332	0.844156
20	CR	11.8	12.1	1.4	13.5	2.15	27.45	44	49	5	54	9	107	268.182	246.939	280	238.889	0.0671937	0.72524
25	CR	9.7	17.6	3.5	21.1	30.95	61.75	39	137	15	152	156	347	248.718	128.467	233.333	198.397	0.37013	0.189241
26	CR	15.4	33.1	32.3	65.4	85.85	166.65	55	163	248	411	445	911	280	203.067	130.242	192.921	0.618812	0.135207
27	CR	12.4	19.85	0	19.85	6.9	39.15	43	77	0	77	30	150	288.372	257.792		230	0.231008	0.484112
28	CR	18.3	31.7	48.5	80.2	76.2	174.7	74	171	315	486	445	1005	247.297	185.38	153.968	171.236	0.628426	0.0255754
33	CR	1.5	39.6	13.55	53.15	71.4	126.05	6	193	100	293	347	646	250	205.181	135.5	205.764	0.945105	0.146527
34	CR	4.6	36	47	83	15.2	102.8	16	180	292	472	56	544	287.5	200	160.959	271.429	0.894977	0.690428
35	CR	15.55	17.45	39.7	57.15	48.35	121.05	58	94	259	353	221	632	268.103	185.638	153.282	218.778	0.572215	0.0834123
36	CR	0.45	6.35	1.75	8.1	0.7	9.25	2	34	6	40	3	45	225	186.765	291.667	233.333
41	CR	31.5	6	75.7	81.7	0.2	113.4	149	35	536	571	1	721	211.409	171.429	141.231	200	0.443463	0.995116
42	CR	39.2	2.7	0	2.7	0.4	42.3	144	9	0	9	2	155	272.222	300		200	0.871122	0.741935
43	CR	25.4	51.8	27.9	79.7	32	137.1	82	254	139	393	109	584	309.756	203.937	200.719	293.578	0.516651	0.427037
44	CR	0.8	3	0	3	0	3.8	3	12	0	12	0	15	266.667	250
49	CR	2.1	5.4	2.05	7.45	45.9	55.45	5	21	7	28	213	246	420	257.143	292.857	215.493	0.560209	0.720712
50	CR	1.4	2.3	0	2.3	13.6	17.3	5	6	0	6	47	58	280	383.333		289.362	0.243243	0.710692
51	CR	2.7	44.4	6.3	50.7	46.25	99.65	11	187	29	216	206	433	245.455	237.433	217.241	224.515	0.898876	0.0458999
52	CR	1.45	35.1	2.45	37.55	52.55	91.55	5	132	7	139	206	350	290	265.909	350	255.097	0.925641	0.166482
57	CR	0	8.6	3.3	11.9	0.75	12.65	0	32	10	42	2	44		268.75	330	375	1	0.881423
58	CR	71.2	16.1	8.65	24.75	58.2	154.15	366	81	49	130	290	786	194.536	198.765	176.531	200.69	0.484106	0.403255
59	CR	80.6	21.9	1.8	23.7	106.4	210.7	425	99	5	104	564	1093	189.647	221.212	360	188.652	0.545542	0.635665
60	CR	48.6	19.9	9.2	29.1	42.35	120.05	274	103	62	165	195	634	177.372	193.204	148.387	217.179	0.250965	0.185444
65	CR	14.9	54.1	15.4	69.5	61.45	145.85	62	278	86	364	278	704	240.323	194.604	179.07	221.043	0.646919	0.0614738
66	CR	25	69.35	14.15	83.5	31.95	140.45	122	335	84	419	136	677	204.918	207.015	168.452	234.926	0.539171	0.446514
67	CR	6.1	28.6	11.6	40.2	54.2	100.5	27	138	69	207	245	479	225.926	207.246	168.116	221.224	0.736501	0.148305
68	CR	120.45	20.9	2.85	23.75	116.3	260.5	732	128	9	137	630	1499	164.549	163.281	316.667	184.603	0.670596	0.660835
73	CR	23.3	34	52.8	86.8	15.5	125.6	160	177	321	498	63	721	145.625	192.09	164.486	246.032	0.576748	0.69697
74	CR	18.1	45.95	13.1	59.05	19.5	96.65	96	305	83	388	79	563	188.542	150.656	157.831	246.835	0.530784	0.503501
75	CR	72.1	15.7	1.8	17.5	45.6	135.2	417	78	5	83	113	613	172.902	201.282	360	403.54	0.609375	0.445325
76	CR	5.2	20.55	4.65	25.2	17.75	48.15	21	165	18	183	79	283	247.619	124.545	258.333	224.684	0.657895	0.173458
5	NaHS	13.25	27.25	18.2	45.45	11.9	70.6	49	129	109	238	49	336	270.408	211.24	166.972	242.857	0.548552	0.585004
6	NaHS	55.1	43.1	29.4	72.5	38.8	166.4	257	231	167	398	204	859	214.397	186.58	176.048	190.196	0.136364	0.302785
7	NaHS	123.9	32.35	3.75	36.1	81.7	241.7	614	127	15	142	302	1058	201.792	254.724	250	270.53	0.54875	0.387097
8	NaHS	74.4	93.2	54.75	147.95	127.15	349.5	332	463	315	778	677	1787	224.096	201.296	173.81	187.814	0.330785	0.0756089
13	NaHS	3.7	10.8	2.15	12.95	2.95	19.6	12	44	7	51	11	74	308.333	245.455	307.143	268.182	0.555556	0.628931
14	NaHS	16.3	47.05	4.75	51.8	60.4	128.5	61	207	23	230	258	549	267.213	227.295	206.522	234.109	0.521292	0.0766488
15	NaHS	20.35	31.8	3.9	35.7	14.8	70.85	75	165	16	181	52	308	271.333	192.727	243.75	284.615	0.273863	0.413861
16	NaHS	0.2	7.6	3.6	11.2	7.2	18.6	1	34	15	49	29	79	200	223.529	240	248.276	0.964912	0.217391
21	NaHS	59.6	26.55	53.8	80.35	75.2	215.15	375	157	361	518	542	1435	158.933	169.108	149.03	138.745	0.148267	0.0331083
22	NaHS	16	20.95	41.2	62.15	47.5	125.65	64	114	266	380	290	734	250	183.772	154.887	163.793	0.590531	0.133607
23	NaHS	13.3	53.75	40.15	93.9	83.25	190.45	51	277	169	446	462	959	260.784	194.043	237.574	180.195	0.751866	0.0601185
24	NaHS	12.1	50.7	15.1	65.8	100.65	178.55	66	241	168	409	620	1095	183.333	210.373	89.881	162.339	0.689345	0.209372
29	NaHS	38.65	21.45	35.35	56.8	49.95	145.4	204	115	225	340	248	792	189.461	186.522	157.111	201.411	0.190152	0.0641686
30	NaHS	54.3	24.3	50.3	74.6	40	168.9	217	129	275	404	192	813	250.23	188.372	182.909	208.333	0.157486	0.30192
31	NaHS	75.2	10.95	14.6	25.55	21.35	122.1	315	46	154	200	90	605	238.73	238.043	94.8052	237.222	0.492804	0.0895522
32	NaHS	82.9	40.6	41.05	81.65	110.8	275.35	410	208	275	483	632	1525	202.195	195.192	149.273	175.316	0.00759648	0.151468
37	NaHS	20.5	29.6	47.8	77.4	15.85	113.75	80	153	337	490	59	629	256.25	193.464	141.84	268.644	0.581205	0.660054
38	NaHS	1.4	10	25.8	35.8	48.1	85.3	5	49	181	230	253	488	280	204.082	142.541	190.119	0.924731	0.146603
39	NaHS	2.8	12.8	20.8	33.6	2.8	39.2	10	65	116	181	10	201	280	196.923	179.31	280	0.846154	0.846154
40	NaHS	35.81	10.95	60.55	71.5	14.25	121.56	170	62	395	457	62	689	210.647	176.613	153.291	229.839	0.332588	0.667638
45	NaHS	0	6	0	6	2.05	8.05	0	23	0	23	6	29		260.87		341.667
46	NaHS	0.2	2.05	0	2.05	1.45	3.7	1	5	0	5	6	12	200	410		241.667
47	NaHS	3.5	33.2	12.5	45.7	45.6	94.8	13	163	39	202	236.3	451.3	269.231	203.681	320.513	192.975	0.857724	0.00109529
48	NaHS	21.75	6.95	52.15	59.1	0	80.85	105	38	345	383	0	488	207.143	182.895	151.159		0.461967	1
53	NaHS	42.8	45.6	69.3	114.9	43.55	201.25	200	261	317	578	196	974	214	174.713	218.612	222.194	0.457197	0.4503
54	NaHS	27.2	22.25	74.85	97.1	32	156.3	112	125	598	723	103	938	242.857	178	125.167	310.68	0.562349	0.50426
55	NaHS	27.95	46.8	13.7	60.5	50.2	138.65	133	261	145	406	204	743	210.15	179.31	94.4828	246.078	0.368005	0.0930443
56	NaHS	73.9	39	17.25	56.25	88.35	218.5	354	249	86	335	449	1138	208.757	156.627	200.581	196.771	0.135613	0.221992
61	NaHS	8.4	47.4	15.3	62.7	11.35	82.45	56	230	83	313	51	420	150	206.087	184.337	222.549	0.763713	0.69345
62	NaHS	5.4	49.6	10.3	59.9	67.3	132.6	23	237	56	293	369	685	234.783	209.283	183.929	182.385	0.834609	0.0581761
63	NaHS	29.1	26.65	65.8	92.45	1	122.55	152	147	469	616	3	771	191.447	181.293	140.299	333.333	0.521185	0.978598
64	NaHS	10.6	29.85	5.85	35.7	36.2	82.5	43	148	29	177	145	365	246.512	201.689	201.724	249.655	0.542117	0.0069541
69	NaHS	57.7	0	0	0	50.3	108	390	0	0	0	277	667	147.949			181.588	1	1
70	NaHS	72.05	30.3	83.25	113.55	53.7	239.3	373	169	557	726	346	1445	193.164	179.29	149.461	155.202	0.223599	0.357848
71	NaHS	10.5	11.3	59.2	70.5	3.9	84.9	47	63	475	538	20	605	223.404	179.365	124.632	195	0.740741	0.895161
72	NaHS	32.4	34.05	64	98.05	8.55	139	124	181	418	599	40	763	261.29	188.122	153.11	213.75	0.503258	0.839587
77	NaHS	7.4	25.55	52.49	78.04	39.7	125.14	31	111	368	479	163	673	238.71	230.18	142.636	243.558	0.826779	0.325633
78	NaHS	0.9	20.15	26.2	46.35	29.7	76.95	4	106	266	372	150	526	225	190.094	98.4962	198	0.961905	0.218935
79	NaHS	36.1	31.7	74.55	106.25	15.5	157.85	171	179	458	637	93	901	211.111	177.095	162.773	166.667	0.492799	0.74538
80	NaHS	1	44.8	42.2	87	64.75	152.75	4	227	252	479	464	947	250	197.357	167.46	139.547	0.977273	0.146623
Note: The 3-year cumulative yield (kg & number of fruit; columns 'H' and 'N') is marked in red for trees that had a cumulative yield below 10 kg, specifically CR trees #36 and #44 and NaHS trees #45 and #46.
Data were analyzed using a one-way analysis of variance (ANOVA) with Treatment as the fixed factor.
Year 1
Yield (kg)
Analysis of Variance Table
Term	Df	Sum Sq	Mean Sq	F value	Pr(>F)	Significance
Treatment	1	1430.67	1430.67	1.81249	0.182109
Residuals	78	61568.5	789.34	NA	NA	NA
Yield (number of fruit)
Analysis of Variance Table
Term	Df	Sum Sq	Mean Sq	F value	Pr(>F)	Significance
Treatment	1	32200.3	32200.3	1.42548	0.236123
Residuals	78	1.76196e+06	22589.2	NA	NA	NA
Average fruit weight (g)
Analysis of Variance Table
Term	Df	Sum Sq	Mean Sq	F value	Pr(>F)	Significance
group	1	10205.6	10205.6	5.19318	0.0254841	*
Residuals	76	149355	1965.2	NA	NA	NA
Year 2
Yield (kg): harvest I
Analysis of Variance Table
Term	Df	Sum Sq	Mean Sq	F value	Pr(>F)	Significance
Treatment	1	277.699	277.699	0.925486	0.339012
Residuals	78	23404.5	300.057	NA	NA	NA
Yield (kg): harvest II
Analysis of Variance Table
Term	Df	Sum Sq	Mean Sq	F value	Pr(>F)	Significance
Treatment	1	4952.43	4952.43	7.29189	0.00849186	**
Residuals	78	52975.3	679.17	NA	NA	NA
Yield (kg): total
Analysis of Variance Table
Term	Df	Sum Sq	Mean Sq	F value	Pr(>F)	Significance
Treatment	1	7575.58	7575.58	6.45703	0.0130355	*
Residuals	78	91512	1173.23	NA	NA	NA
Yield (number of fruit): harvest I
Analysis of Variance Table
Term	Df	Sum Sq	Mean Sq	F value	Pr(>F)	Significance
Treatment	1	12776.5	12776.5	1.61913	0.206993
Residuals	78	615496	7890.98	NA	NA	NA
Yield (number of fruit): harvest II
Analysis of Variance Table
Term	Df	Sum Sq	Mean Sq	F value	Pr(>F)	Significance
Treatment	1	239586	239586	7.62813	0.00716293	**
Residuals	78	2.44984e+06	31408.2	NA	NA	NA
Yield (number of fruit): total
Analysis of Variance Table
Term	Df	Sum Sq	Mean Sq	F value	Pr(>F)	Significance
Treatment	1	363017	363017	7.85305	0.0063968	**
Residuals	78	3.60564e+06	46226.2	NA	NA	NA
Average fruit weight (g): harvest I
Analysis of Variance Table
Term	Df	Sum Sq	Mean Sq	F value	Pr(>F)	Significance
group	1	5311.47	5311.47	2.38719	0.126434
Residuals	77	171324	2224.99	NA	NA	NA
Average fruit weight (g): harvest II
Analysis of Variance Table
Term	Df	Sum Sq	Mean Sq	F value	Pr(>F)	Significance
group	1	43173.2	43173.2	10.4701	0.00186448	**
Residuals	69	284520	4123.47	NA	NA	NA
Year 3
Yield (kg)
Analysis of Variance Table
Term	Df	Sum Sq	Mean Sq	F value	Pr(>F)	Significance
Treatment	1	881.46	881.46	0.859829	0.356647
Residuals	78	79962.3	1025.16	NA	NA	NA
Yield (number of fruit)
Analysis of Variance Table
Term	Df	Sum Sq	Mean Sq	F value	Pr(>F)	Significance
Treatment	1	65912.4	65912.4	2.09464	0.151824
Residuals	78	2.45444e+06	31467.2	NA	NA	NA
Average fruit weight (g)
Analysis of Variance Table
Term	Df	Sum Sq	Mean Sq	F value	Pr(>F)	Significance
group	1	9329.85	9329.85	3.71144	0.0577798
Residuals	76	191050	2513.81	NA	NA	NA
# Cumulative Yield
Note: Trees with a 3-year cumulative yield below 10 kg were excluded, specifically CR trees #36 and #44 and NaHS trees #45 and #46.
Cumulative fruit number was analyzed using a linear mixed-effects model fitted with the lmer function.
The model included Treatment, Year, and their interaction (Treatment × Year) as fixed effects, while Tree number was included as a random effect to account for repeated observations from the same tree across years.
Yield (kg)
Type III Analysis of Variance Table with Satterthwaite's method
Term	NumDF	DenDF	Sum Sq	Mean Sq	F value	Pr(>F)	Significance
Treatment	1	74	4205.68	4205.68	5.78245	0.018689	*
Year	2	148	29074.3	14537.2	19.9873	2.07024e-08	***
Treatment:Year	2	148	2063.75	1031.88	1.41874	0.245291
emmeans
Treatment	Year	emmean	SE	df	lower.CL	upper.CL
CR	1	22.3434	5.04955	197.447	12.3854	32.3014
NaHS	1	31.2739	5.04955	197.447	21.316	41.2319
CR	2	44.0855	5.04955	197.447	34.1275	54.0435
NaHS	2	64.6524	5.04955	197.447	54.6944	74.6103
CR	3	35.0921	5.04955	197.447	25.1341	45.0501
NaHS	3	42.0066	5.04955	197.447	32.0486	51.9646
contrast	estimate	SE	df	t.ratio	p.value	Significance
NaHS - CR	12.1373	5.04738	74	2.40467	0.018689	*
Yield (number of fruit)
Type III Analysis of Variance Table with Satterthwaite's method
Term	NumDF	DenDF	Sum Sq	Mean Sq	F value	Pr(>F)	Significance
Treatment	1	74	214298	214298	8.21706	0.00540101	**
Year	2	148	1.28089e+06	640445	24.5572	6.16877e-10	***
Treatment:Year	2	148	108336	54167.8	2.07701	0.128942
Treatment	Year	emmean	SE	df	lower.CL	upper.CL
CR	1	107.737	29.3821	204.784	49.8067	165.667
NaHS	1	150.079	29.3821	204.784	92.1488	208.009
CR	2	238.105	29.3821	204.784	180.175	296.035
NaHS	2	380.553	29.3821	204.784	322.622	438.483
CR	3	159.579	29.3821	204.784	101.649	217.509
NaHS	3	219.771	29.3821	204.784	161.841	277.701
contrast	estimate	SE	df	t.ratio	p.value	Significance
NaHS - CR	81.6605	28.4875	74	2.86654	0.00540101	**
# ABI
Note: Trees with a 3-year cumulative yield below 10 kg were excluded, specifically CR trees #36 and #44 and NaHS trees #45 and #46.
Data were analyzed using a one-way analysis of variance (ANOVA) with Treatment as the fixed factor.
# 2024-2025
Analysis of Variance Table
Term	Df	Sum Sq	Mean Sq	F value	Pr(>F)	Significance
Treatment	1	0.0345316	0.0345316	0.523357	0.471694
Residuals	74	4.88258	0.0659809	NA	NA	NA
# 2025-2026
Term	Df	Sum Sq	Mean Sq	F value	Pr(>F)	Significance
Treatment	1	0.0726645	0.0726645	0.765061	0.384579
Residuals	74	7.02842	0.0949787	NA	NA	NA
